# Supplementary material for: An optimised glucose oxidase bioelectrode exhibiting high performance direct electron transfer
Source: Royal Society of Chemistry journal article supplement (doi:10.1039/c2cp41651d), 2012-01-01
Supplement: c2cp41651d.pdf [file c2cp41651d.pdf]

Electronic Supplementary Information for:

## An optimised glucose oxidase bioelectrode exhibiting high performance direct electron transfer

Ross D. Milton,<sup>a</sup> Jessica Baur,<sup>a</sup> John R. Varcoe,<sup>a</sup> Alfred E. Thumser<sup>b</sup> and Robert C. T. Slade\*<sup>a</sup>

<sup>a</sup> Department of Chemistry, University of Surrey, Guildford, Surrey GU2 7XH, United Kingdom

<sup>b</sup> Department of Biochemistry and Physiology, University of Surrey, Guildford, Surrey GU2 7XH, United Kingdom

E-mail: [r.slade@surrey.ac.uk](mailto:r.slade@surrey.ac.uk)

### Figures

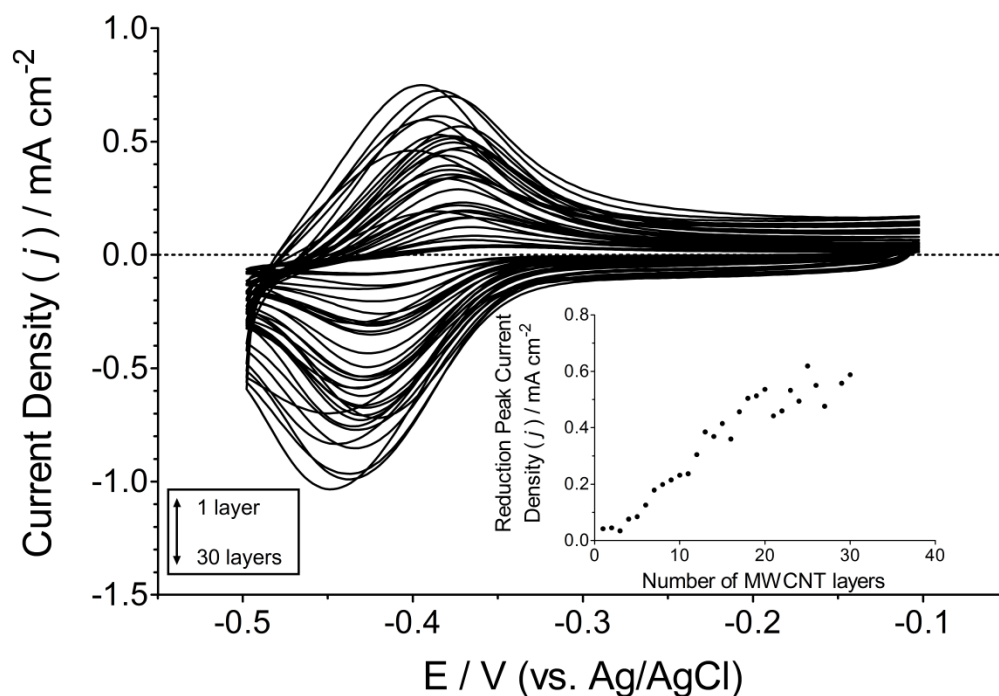

**Fig. S.1.** – Cyclic voltammograms showing the effect on current intensities by increasing the number of MWCNT “primer” layers), at a scan rate of 100 mV s<sup>-1</sup> with citrate buffer electrolyte (0.2 mol dm<sup>-3</sup>, pH = 6) and a GOd loading of 1 mg. The starting potential was -0.1 V.

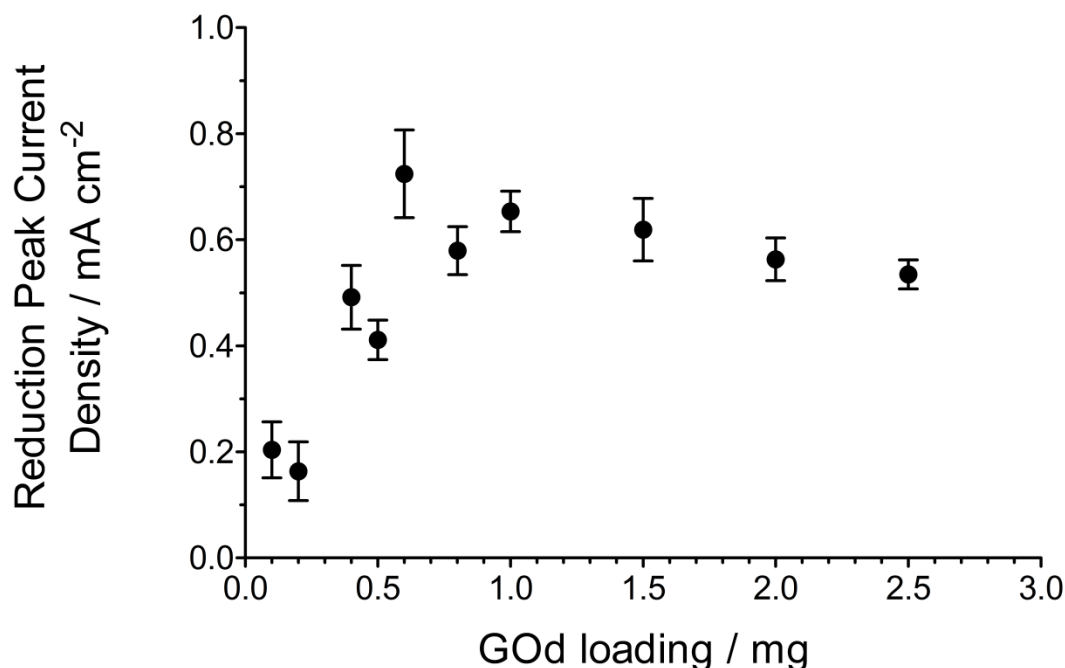

**Fig. S.2.** – The modulus of reduction peak current vs. enzyme loading (GOd) extracted from cyclic voltammograms, at a scan rate of  $100 \text{ mV s}^{-1}$  with citrate buffer electrolyte ( $0.2 \text{ mol dm}^{-3}$ ,  $\text{pH} = 6$ ) and a 20 MWCNT layers,  $n = 3$ . The starting potential was  $-0.1 \text{ V}$ .

#### Calculation of the Turnover Rate (TR)

$$i_p = \frac{n^2 F^2}{4RT} \nu A \Gamma_o^* \quad \text{Equation 1}^1$$

The surface coverage of the Method 4 bioelectrode was determined using Equation 1, where  $i_p$  = peak current,  $n$  = number of electrons transferred,  $F$  = Faraday's constant,  $R$  = gas constant,  $T$  = temperature,  $\nu$  = scan rate,  $A$  = area of electrode and  $\Gamma_o^*$  = surface coverage. The surface coverage of GOd on the method 4 bioelectrode was calculated to be  $1.398 \times 10^{-12} \text{ mol cm}^{-2}$ .

$$TR = \frac{I_{cat}/A}{nF\Gamma_{GOd}} \quad \text{Equation 2}^2$$

The turnover rate at a saturated electrode was calculated by using equation 2, where  $I_{cat}$  is the current at the glucose saturation. The turnover rate was calculated to be  $74.1 \text{ s}^{-1}$ .

#### Chemicals

Nanocyl-3100 MWCNTs were supplied by Nanocyl (Belgium). GOd (*Aspergillus niger*,  $200 \text{ U mg}^{-1}$ ), glucose, microcrystalline cellulose, 1-ethyl-3-methylimidazolium acetate

(EMIM–acetate), citric acid, and sodium citrate were purchased from Sigma–Aldrich (UK). Partially oxidised MWCNTs were prepared by refluxing in aqueous  $\text{HNO}_3$  ( $2.6 \text{ mol dm}^{-3}$ ) for 10 h, rinsing with water until a neutral pH was obtained and drying the product in an oven at  $80^\circ\text{C}$  for  $12 \text{ h}^3$ . Glucose solutions were allowed to mutarotate for 1 d and were kept refrigerated. Ultrapure water was used to prepare all solutions ( $18.2 \text{ M}\Omega \text{ cm}^{-1}$ , Select Fusion system from Purite, U.K.).

### Instrumentation and Procedures

Electrochemical analyses were carried out using an Autolab PGSTAT302N (EcoChemie, Netherlands) in a  $15 \text{ cm}^3$  three electrode water–jacketed cell at  $22 \pm 1^\circ\text{C}$  with a Pt wire counter electrode, and an Ag/AgCl (NaCl(aq),  $3 \text{ mol dm}^{-3}$ ,  $+0.196 \text{ V}$  vs. SHE at 298 K) reference electrode. An aqueous citrate buffer ( $0.2 \text{ mol dm}^{-3}$ , pH = 6) purged with either high–purity nitrogen or air was used as electrolyte.

Before use, glassy carbon electrodes (GC, diameter = 3 mm) were polished with  $0.5 \mu\text{m}$  alumina, and ultrasonically washed in deionised water. Stable MWCNT dispersions in water ( $0.1 \text{ mg cm}^{-3}$ ) were obtained by sonication for 5 min. The EMIM–acetate/MWCNT/cellulose matrix was prepared as follows: cellulose (3% w/w) was dissolved in EMIM–acetate at  $70^\circ\text{C}$  for 1 h under sonication, and this solution was then ground with MWCNT (0.1% w/w) in an agate mortar under nitrogen. The resulting dispersion was transferred to a sealed tube and stored in a desiccator until use.

In method 1,  $10 \mu\text{L}$  of the MWCNT/EMIM–acetate/cellulose matrix was applied to the electrode surface; the MWCNT/EMIM–acetate/cellulose matrix modified electrode was then soaked in ultrapure water to remove the EMIM–acetate from the matrix, yielding a MWCNT–embedded cellulose layer on the electrode surface. A  $10 \mu\text{L}$  GOd aliquot ( $80 \text{ mg cm}^{-3}$ ) was then added onto the MWCNT/cellulose layer.

Method 2 involved the direct dissolution of the lyophilized enzyme powder ( $80 \text{ mg cm}^{-3}$ ) with the MWCNT/EMIM–acetate/cellulose matrix. The mixture was sonicated for 1 h to maximise dispersion. The matrix was added to the electrode and the EMIM–acetate was removed as before.

Method 3 involved enzyme adsorption in reverse order to method 1. A  $10 \mu\text{L}$  aliquot of the GOd solution ( $80 \text{ mg cm}^{-3}$ ) was added to the electrode surface and dried. The MWCNT/EMIM–acetate/cellulose layer was then added to the electrode and the EMIM–acetate removed as before.

Method 4 involved the pre–treatment of the GC electrodes with MWCNT by depositing successive layers (20 layers) of  $10 \mu\text{L}$  aliquots of aqueous MWCNT dispersion ( $0.1 \text{ mg cm}^{-3}$ ). The electrodes were then prepared in an identical fashion to method 3.

During bioelectrode preparation, good surface coverage was achieved for method 4 following the addition of the MWCNT/cellulose layer, whilst surface defects were observed by eye for methods 1 – 3. Method 2 exhibited poor repeatability and the low magnitude of the observed currents is most probably due to loss of enzyme activity

during sonication. Desorption of GOD from the MWCNT/cellulose matrix was observed during electrochemical analysis of method 1 bioelectrodes, which again highlights the importance of the MWCNT/cellulose encapsulation.

## References

1. A. J. Bard and L. Faulkner, in *Electrochemical Methods: Fundamentals and Applications*, ed. E. Swain, John Wiley & Sons, New Jersey, 2 edn., 2001, ch. 14: Electroactive layers and modified electrodes, pp. 590-593.
2. G. Liu, M. N. Paddon-Row and J. J. Gooding, *Electrochem. Commun.*, 2007, **9**, 2218-2223.
3. X. E. Wu, F. Zhao, J. R. Varcoe, A. E. Thumser, C. Avignone-Rossa and R. C. T. Slade, *Bioelectrochemistry*, 2009, **77**, 64-68.
